# Supplementary material for: An Integrative Analysis of DNA Methylation Pattern in Myotonic Dystrophy Type 1 Samples Reveals a Distinct DNA Methylation Profile between Tissues and a Novel Muscle-Associated Epigenetic Dysregulation
Source: MDPI journal article supplement (doi:10.3390/biomedicines10061372), 2022-06-10
Supplement: s1 [file s1]

(A)

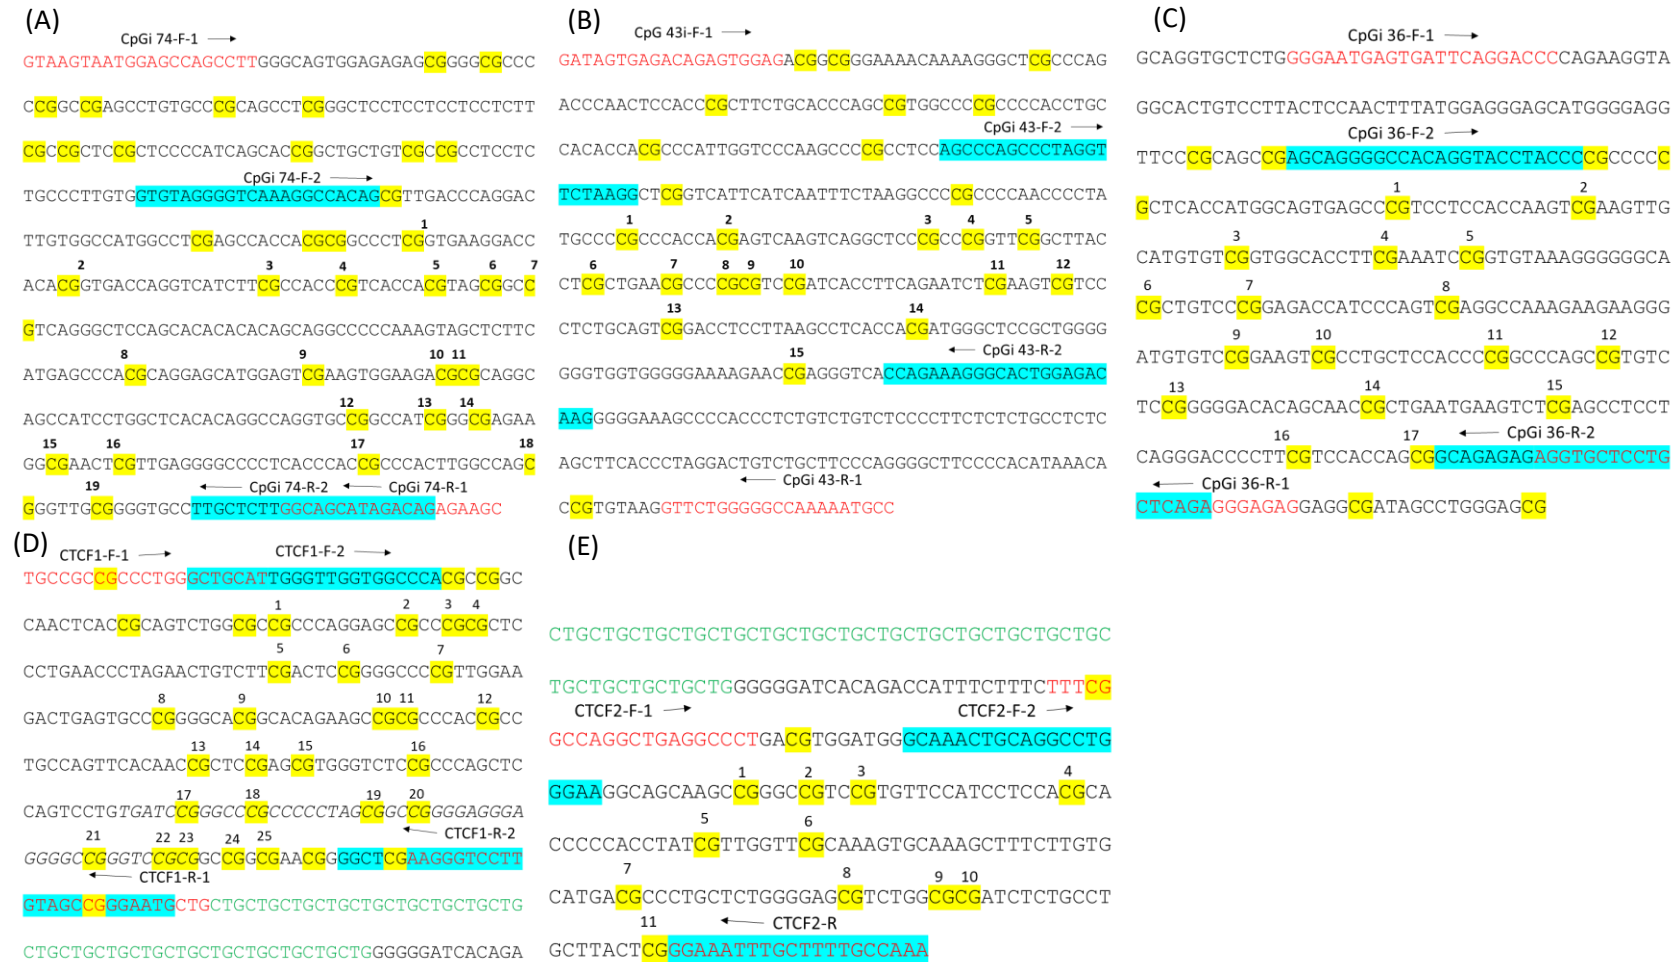

**Figure S1.** The location of the primers and CpGs investigated in this study for the five annotated regions: (A) CpGi 74, (B) CpGi 43, (C) CpGi 36, (D) CTCF1 and (E) CTCF2. Red letters indicate the external primers used (PCR1), blue highlight indicates the internal primers (PCR2), green letters are used for the CTG expansion and yellow highlight indicate the CpGs present. The numbers correspond to the CpGs analysed in this study. The other CpGs were not readable.

**Table S1.** Primer combinations and thermocycler settings

| Primer Name        | Sequence (5'-3')         | Tm   | Cycles |
|--------------------|--------------------------|------|--------|
| <b>Long PCR</b>    |                          |      |        |
| DM-C               | AACGGGGGCTCGAAGGGTCTCT   | 63.5 | 28     |
| DM-DR              | CAGGCCTGCAGTTTGCCCATC    |      |        |
| <b>Methylation</b> |                          |      |        |
| CpGi 74-F-1        | GGTAAGTAATGGAGTTAGTTT    | 57   | 40     |
| CpGi 74-R-1        | ACTTCTCTATCTATACTACCA    |      |        |
| CpGi 74-F-2        | CTGTAGGGGTAAAGGTTATAG    | 55   | 40     |
| CpGi 74-R-2        | CTATCTATACTACCAAAAACAA   |      |        |
| CpGi 43-F-1        | GATAGTGAGATAGAGTGGAG     | 55   | 40     |
| CpGi 43-R-1        | AACATTTTTTAACCCCCAAAAC   |      |        |
| CpGi 43-F-2        | AGTTTAGTTTTAGGTTTTAAGGT  | 55   | 40     |
| CpGi 43-R-2        | CTTATCTCCAATACCCCTTCTAA  |      |        |
| CpGi 36-F-1        | GGGAATGAGTGATTTAGGATTT   | 57   | 40     |
| CpGi 36-R-1        | CTCTCCCTCTAAACAAAACACCT  |      |        |
| CpGi 36-F-2        | AGTAGGGGTATAGGTATTTATTT  | 57   | 40     |
| CpGi 36-R-2        | TCTAAACAAAACACCTCTCTCTAC |      |        |
| CTCF1-F-1          | TGTYGTYGTTTTGGGTGTATTG   | 57   | 40     |
| CTCF1-R-1          | TTCCYGACTACAAAACCCCTTYG  |      |        |
| CTCF1-F-2          | GTTGTATTGGGTGGTGGTTTA    | 57   | 40     |
| CTCF1-R-2          | CTACAAAACCCCTTYGAACCC    |      |        |
| CTCF2-F-1          | TTYGGTTAGGTTTGGGTTT      | 57   | 40     |
| CTCF2-R            | TTAACAAAACAAATTTCCC      |      |        |
| CTCF2-F-2          | TAAATTGTAGGTTTGGGAAG     | 57   | 40     |

1 and 2 in the primer name correspond to PCR 1 and 2 in the nested PCR. Tm= melting temperature

**Table S2.** DNA methylation analysis of CpGi 74 in blood samples across the clinical DM1 subtypes.

[illegible]

|                      |     |   |   |   |   |   |   |   |   |   |   |   |   |   |   |   |      |   |   |   |   |
|----------------------|-----|---|---|---|---|---|---|---|---|---|---|---|---|---|---|---|------|---|---|---|---|
| Late-onset           | P38 | 1 | 1 | 1 | 1 | 1 | 1 | 1 | 1 | 1 | 1 | 1 | 1 | 1 | 1 | 1 | 1    | 1 | 1 | 1 | 1 |
|                      | P40 | 1 | 1 | 1 | 1 | 1 | 1 | 1 | 1 | 1 | 1 | 1 | 1 | 1 | 1 | 1 | 1    | 1 | 1 | 1 | 1 |
|                      | P41 | 1 | 1 | 1 | 1 | 1 | 1 | 1 | 1 | 1 | 1 | 1 | 1 | 1 | 1 | 1 | 1    | 1 | 1 | 1 | 1 |
|                      | P50 | 1 | 1 | 1 | 1 | 1 | 1 | 1 | 1 | 1 | 1 | 1 | 1 | 1 | 1 | 1 | 1    | 1 | 1 | 1 | 1 |
|                      | P51 | 1 | 1 | 1 | 1 | 1 | 1 | 1 | 1 | 1 | 1 | 1 | 1 | 1 | 1 | 1 | 1    | 1 | 1 | 1 | 1 |
|                      | P52 | 1 | 1 | 1 | 1 | 1 | 1 | 1 | 1 | 1 | 1 | 1 | 1 | 1 | 1 | 1 | 1    | 1 | 1 | 1 | 1 |
|                      | P53 | 1 | 1 | 1 | 1 | 1 | 1 | 1 | 1 | 1 | 1 | 1 | 1 | 1 | 1 | 1 | 1    | 1 | 1 | 1 | 1 |
|                      | P54 | 1 | 1 | 1 | 1 | 1 | 1 | 1 | 1 | 1 | 1 | 1 | 1 | 1 | 1 | 1 | 1    | 1 | 1 | 1 | 1 |
|                      | P55 | 1 | 1 | 1 | 1 | 1 | 1 | 1 | 1 | 1 | 1 | 1 | 1 | 1 | 1 | 1 | 1    | 1 | 1 | 1 | 1 |
|                      | P56 | 1 | 1 | 1 | 1 | 1 | 1 | 1 | 1 | 1 | 1 | 1 | 1 | 1 | 1 | 1 | 1    | 1 | 1 | 1 | 1 |
|                      | P57 | 1 | 1 | 1 | 1 | 1 | 1 | 1 | 1 | 1 | 1 | 1 | 1 | 1 | 1 | 1 | 1    | 1 | 1 | 1 | 1 |
|                      | P58 | 1 | 1 | 1 | 1 | 1 | 1 | 1 | 1 | 1 | 1 | 1 | 1 | 1 | 1 | 1 | 1    | 1 | 1 | 1 | 1 |
| Asymptomatic Control | P59 | 1 | 1 | 1 | 1 | 1 | 1 | 1 | 1 | 1 | 1 | 1 | 1 | 1 | 1 | 1 | 1    | 1 | 1 | 1 | 1 |
|                      | P60 | 1 | 1 | 1 | 1 | 1 | 1 | 1 | 1 | 1 | 1 | 1 | 1 | 1 | 1 | 1 | 1    | 1 | 1 | 1 | 1 |
|                      | P61 | 1 | 1 | 1 | 1 | 1 | 1 | 1 | 1 | 1 | 1 | 1 | 1 | 1 | 1 | 1 | 1    | 1 | 1 | 1 | 1 |
|                      | P65 | 1 | 1 | 1 | 1 | 1 | 1 | 1 | 1 | 1 | 1 | 1 | 1 | 1 | 1 | 1 | 1    | 1 | 1 | 1 | 1 |
|                      | C1  | 1 | 1 | 1 | 1 | 1 | 1 | 1 | 1 | 1 | 1 | 1 | 1 | 1 | 1 | 1 | 1    | 1 | 1 | 1 | 1 |
|                      | C2  | 1 | 1 | 1 | 1 | 1 | 1 | 1 | 1 | 1 | 1 | 1 | 1 | 1 | 1 | 1 | 1    | 1 | 1 | 1 | 1 |
|                      | C3  | 1 | 1 | 1 | 1 | 1 | 1 | 1 | 1 | 1 | 1 | 1 | 1 | 1 | 1 | 1 | 1    | 1 | 1 | 1 | 1 |
|                      | C4  | 1 | 1 | 1 | 1 | 1 | 1 | 1 | 1 | 1 | 1 | 1 | 1 | 1 | 1 | 1 | 0.75 | 1 | 1 | 1 | 1 |

**Table S3.** DNA methylation analysis of CpGi 43 in blood across the DM1 clinical subtypes

[illegible]

**Table S4.** DNA methylation analysis of CpGi 36 in blood across the DM1 clinical subtypes

|           |   |   |   |   |   |   |   |   |   |   |   |   |   |   |   |     |     |   |
|-----------|---|---|---|---|---|---|---|---|---|---|---|---|---|---|---|-----|-----|---|
| <b>C2</b> | 1 | 1 | 1 | 1 | 1 | 1 | 1 | 1 | 1 | 1 | 1 | 1 | 1 | 1 | 1 | 1   | 1   | 1 |
| <b>C3</b> | 1 | 1 | 1 | 1 | 1 | 1 | 1 | 1 | 1 | 1 | 1 | 1 | 1 | 1 | 1 | 1   | 1   | 1 |
| <b>C4</b> | 1 | 1 | 1 | 1 | 1 | 1 | 1 | 1 | 1 | 1 | 1 | 1 | 1 | 1 | 1 | 0.9 | 0.9 | 1 |

**Table S5.** DNA methylation analysis of CTCF1 in blood across the DM1 clinical subtypes

| CpG<br>→ |      | 1    | 2    | 3    | 4    | 5    | 6    | 7    | 8    | 9    | 10   | 11   | 12   | 13   | 14   | 15   | 16   | 17   | 18   | 19   | 20   | 21   | 22   | 23   | 24   | 25   |      |
|----------|------|------|------|------|------|------|------|------|------|------|------|------|------|------|------|------|------|------|------|------|------|------|------|------|------|------|------|
| Co       | P1   | NA   | NA   | 0.15 | 0.25 | 0.25 | 0.25 | 0.25 | 0.5  | 0.5  | 0.6  | 0.65 | 1    | 0.65 | 0.65 | 0.5  | 0.75 | 0.75 | NA   |      |
|          | P1-2 | 0.25 | 0.25 | 0.25 | 0.4  | 0.25 | 0.25 | 0.25 | 0.4  | 0.25 | 0.5  | 0.5  | 0.4  | 0.4  | 0.5  | 0.4  | 0.65 | 0.6  | 0.6  | 0.5  | 0.6  | 0.9  | 0.9  | 0.9  | 0.9  | NA   |      |
|          | P2   | NA   | 0.15 | 0.15 | 0.25 | 0.25 | 0.25 | 0.25 | 0.4  | 0.4  | 0.5  | 0.5  | 0.5  | 0.5  | 0.5  | 0.5  | 1    | 0.8  | 1    | 0.5  | 0.75 | 0.9  | 0.9  | 0.75 | 0.75 | NA   |      |
|          | P3   | 0    | 0.15 | 0.25 | 0.15 | 0.15 | 0.25 | 0.25 | 0.25 | 0.35 | 0.4  | 0.4  | 0.4  | 0.4  | 0.4  | 0.4  | 0.55 | 0.6  | 0.6  | 0.5  | 0.5  | 0.75 | 0.75 | 0.75 | 0.75 | 0.75 | 0.75 |
|          | P4   | NA   | 0.25 | 0.25 | 0.25 | 0.25 | 0.25 | 0.25 | 0.3  | 0.4  | 0.5  | 0.5  | 0.5  | 0.4  | 0.4  | 0.4  | 0.75 | 0.75 | 0.75 | 0.5  | 0.5  | NA   | NA   | NA   | NA   | NA   | NA   |
| Ch       | P5   | 1    | 1    | 1    | 1    | 1    | 1    | 1    | 1    | 0.45 | 1    | 1    | 1    | 1    | 1    | 1    | 1    | 1    | 1    | 0.6  | 0.75 | 1    | 0.75 | 1    | 1    | 1    | 1    |
|          | P6   | 0.25 | 0.25 | 0.25 | 0.4  | 0.25 | 0.25 | 0.25 | 0.4  | 0.25 | 0.25 | 0.25 | 0.25 | 0.4  | 0.4  | 0.25 | 0.5  | 0.5  | 0.6  | 0.5  | 0.6  | 0.8  | 0.9  | 1    | 1    | NA   |      |
|          | P7   | 1    | 1    | 1    | 0.6  | 0.75 | 0.75 | 0.75 | 0.75 | 0.75 | 0.75 | 0.8  | 0.75 | 0.85 | 0.85 | 0.75 | 0.85 | 0.85 | 0.85 | 0.9  | 0.9  | 0.9  | 0.9  | 0.9  | 0.9  | 0.9  |      |
|          | P8   | 0    | 0    | 0    | 0    | 0    | 0    | 0    | 0    | 0    | 0    | 0    | 0    | 0.25 | 0    | 0    | 0    | 0    | 0    | 0    | 0    | NA   | NA   | NA   | NA   | NA   |      |
|          | P9   | 0    | 0    | 0    | 0    | 0    | 0    | 0    | 0    | 0    | 0    | 0    | 0    | 0.25 | 0    | 0    | 0    | 0    | 0    | 0    | 0    | NA   | NA   | NA   | NA   | NA   |      |
| Juv      | P10  | NA   | 0.25 | 0.5  | 0.5  | 0.25 | 0.25 | 0.25 | 0.25 | 0.25 | 0.4  | 0.5  | 0.45 | 0.45 | 0.5  | 0.4  | 0.75 | 0.75 | 0.75 | 0.5  | 0.75 | 0.75 | 0.75 | 0.75 | 0.75 | 0.75 | 0.75 |
|          | P11  | 0    | 0    | 0    | 0    | 0    | 0    | 0    | 0    | 0    | 0    | 0    | 0    | 0    | 0    | 0    | 0    | 0    | 0    | 0    | 0    | 0    | 0    | 0    | 0    | 0    |      |
|          | P12  | NA   | 0.5  | 0.75 | 0.5  | 0.5  | 0.5  | 0.5  | 0.5  | 0.5  | 0.6  | 0.75 | 0.55 | 0.5  | 0.5  | 0.5  | 0.75 | 0.5  | 0.55 | 0.4  | 0.5  | 0.75 | 0.8  | 0.75 | 0.8  | 0.8  |      |
|          | P13  | 0    | 0    | 0    | 0    | 0    | 0    | 0    | 0    | 0    | 0    | 0    | 0    | 0    | 0    | 0    | 0    | 0    | 0    | 0    | 0    | 0    | 0    | 0    | 0    | 0    |      |
|          | P14  | NA   | 0    | 0    | 0    | 0    | 0.25 | 0    | 0    | 0.25 | 0    | 0    | 0    | 0    | 0    | 0    | 0    | 0    | 0    | 0    | 0    | 0    | 0    | 0    | 0    | 0    |      |
| A        | P15  | NA   | 0    | 0    | 0    | 0    | 0    | 0    | 0    | 0    | 0    | 0    | 0    | 0    | 0    | 0    | 0    | NA   |      |
|          | P16  | 0    | 0    | 0    | 0    | 0    | 0    | 0    | 0    | 0    | 0    | 0    | 0.5  | 0    | 0    | 0    | 0    | 0    | 0    | 0    | 0    | 0    | 0    | 0    | 0    | 0    |      |
|          | P17  | 0    | 0    | 0    | 0    | 0    | 0    | 0    | 0    | 0    | 0    | 0    | 0.25 | 0    | 0    | 0    | 0    | 0    | 0    | 0    | 0    | 0    | 0    | 0    | 0    | 0    |      |
|          | P18  | 0    | 0    | 0    | 0    | 0    | 0    | 0    | 0    | 0    | 0    | 0    | 0    | 0    | 0    | 0    | 0    | 0    | 0    | 0    | 0    | 0    | 0    | 0    | 0    | 0    |      |
|          | P19  | NA   | 0.25 | 0.25 | 0.25 | 0.25 | 0.25 | 0.25 | 0.4  | 0.5  | 0.5  | 0.5  | 0.5  | 0.5  | 0.5  | 0.5  | 0.8  | 0.9  | 0.9  | 0.5  | 0.6  | 0.9  | 1    | 0.75 | 0.75 | NA   |      |
|          | P20  | NA   | 0.15 | 0.15 | 0.25 | 0.25 | 0.25 | 0.25 | 0.4  | 0.4  | 0.5  | 0.5  | 0.5  | 0.5  | 0.5  | 0.5  | 0.75 | 0.75 | 0.75 | 0.75 | 0.5  | 0.4  | 0.9  | 0.9  | 0.5  | 0.9  |      |
|          | P21  | 0    | 0    | 0    | 0    | 0    | 0    | 0    | 0    | 0    | 0    | 0    | 0    | 0    | 0    | 0    | 0    | 0    | 0    | 0    | 0    | 0    | 0    | 0    | 0    | 0    |      |
|          | P22  | NA   | 0    | 0    | 0    | 0    | 0    | 0    | 0    | 0    | 0    | 0    | 0    | 0    | 0    | 0    | 0    | 0    | 0    | 0    | 0    | 0    | 0    | 0    | 0    | 0    |      |
|          | P23  | NA   | 0    | 0    | 0    | 0    | 0    | 0    | 0    | 0    | 0    | 0    | 0    | 0    | 0    | 0    | 0    | 0    | 0    | 0    | 0    | 0    | 0    | 0    | 0    | 0    |      |
|          | P24  | NA   | 0.05 | 0.05 | 0.05 | 0.05 | 0    | 0    | 0    | 0    | 0    | 0    | 0    | 0    | 0    | 0    | 0    | 0    | 0    | 0    | 0    | 0    | NA   | NA   | NA   | NA   |      |
|          | P25  | NA   | 0    | 0    | 0    | 0    | 0    | 0    | 0    | 0    | 0    | 0    | 0    | 0    | 0    | 0    | 0    | 0    | 0    | 0    | 0    | 0    | NA   | NA   | NA   | NA   |      |
|          | P26  | NA   | 0    | 0    | 0    | 0    | 0    | 0    | 0    | 0    | 0    | 0    | 0    | 0    | 0    | 0    | 0    | 0    | 0    | 0    | 0    | 0    | NA   | NA   | NA   | NA   |      |
|          | P27  | NA   | 0    | 0    | 0    | 0    | 0    | 0    | 0    | 0    | 0    | 0    | 0    | 0    | 0    | 0    | 0    | 0    | 0    | 0    | 0    | 0    | NA   | NA   | NA   | NA   |      |
|          | P28  | 0    | 0    | 0    | 0    | 0    | 0    | 0    | 0    | 0    | 0    | 0    | 0    | 0    | 0    | 0    | 0    | 0    | 0    | 0    | 0    | 0    | 0    | 0    | 0    | 0    |      |
|          | P29  | 0.05 | 0.05 | 0.05 | 0.05 | 0    | 0    | 0    | 0    | 0    | 0    | 0    | 0    | 0    | 0    | 0    | 0    | 0    | 0    | 0    | 0    | 0    | 0    | 0    | 0    | 0    | 0    |
|          | P30  | 0.05 | 0.05 | 0.05 | 0    | 0    | 0    | 0    | 0    | 0    | 0    | 0    | 0    | 0    | 0    | 0    | 0    | 0    | 0    | 0    | 0    | 0    | 0    | 0    | 0    | 0    | 0    |
|          | P31  | 0.4  | 0.4  | 0.25 | 0.45 | 0.6  | 0.75 | 0.75 | 0.75 | 0.7  | 0.8  | 0.75 | 0.8  | 0.8  | 0.8  | 0.8  | 0.75 | 0.75 | 0.85 | 0.85 | 0.85 | 1    | 1    | 0.9  | 0.75 | 1    | 1    |
|          | P32  | 0    | 0    | 0    | 0    | 0    | 0    | 0    | 0    | 0    | 0    | 0    | 0    | 0    | 0    | 0    | 0    | 0    | 0    | 0    | 0    | 0    | 0    | 0    | 0    | 0    | 0    |
|          | P33  | 0    | 0    | 0    | 0    | 0    | 0    | 0    | 0    | 0    | 0    | 0    | 0    | 0    | 0    | 0    | 0    | 0    | 0    | 0    | 0    | 0    | 0    | 0    | 0    | 0    | 0    |
|          | P34  | 0    | 0    | 0    | 0    | 0    | 0    | 0    | 0    | 0    | 0    | 0    | 0    | 0    | 0    | 0    | 0    | 0    | 0    | 0    | 0    | NA   | NA   | NA   | NA   | NA   | NA   |
|          | P35  | 0    | 0    | 0    | 0    | 0    | 0    | 0    | 0    | 0    | 0    | 0    | 0    | 0    | 0    | 0    | 0    | 0    | 0    | 0    | 0    | NA   | NA   | NA   | NA   | NA   | NA   |
|          | P36  | 0    | 0    | 0    | 0    | 0    | 0    | 0    | 0    | 0    | 0    | 0    | 0    | 0    | 0    | 0    | 0    | 0    | 0    | 0    | 0    | 0    | 0    | 0    | 0    | 0    | 0    |
|          | P37  | 0    | 0    | 0    | 0    | 0    | 0    | 0    | 0    | 0    | 0    | 0    | 0    | 0    | 0    | 0    | 0    | 0    | 0    | 0    | 0    | 0    | NA   | NA   | NA   | NA   | NA   |
|          | P38  | 0    | 0    | 0    | 0    | 0    | 0    | 0    | 0    | 0    | 0    | 0    | 0    | 0.25 | 0    | 0    | 0    | 0    | 0    | 0    | 0    | 0    | NA   | NA   | NA   | NA   | NA   |
|          | P39  | 0    | 0    | 0    | 0    | 0    | 0    | 0    | 0    | 0    | 0    | 0    | 0    | 0.25 | 0    | 0    | 0    | 0    | 0    | 0    | 0    | 0    | NA   | NA   | NA   | NA   | NA   |
| P40      | 0    | 0    | 0    | 0    | 0    | 0    | 0    | 0    | 0    | 0    | 0    | 0    | 0.25 | 0    | 0    | 0    | 0    | 0    | 0    | 0    | 0    | NA   | NA   | NA   | NA   | NA   |      |
| P41      | 0    | 0    | 0    | 0    | 0    | 0    | 0    | 0    | 0    | 0    | 0    | 0    | 0    | 0    | 0    | 0    | 0    | 0    | 0    | 0    | 0    | 0    | NA   | NA   | NA   | NA   |      |
| P42      | 0    | 0    | 0    | 0    | 0    | 0    | 0    | 0    | 0    | 0    | 0    | 0    | 0    | 0    | 0    | 0    | 0    | 0    | 0    | 0    | 0    | 0    | 0    | 0    | 0    | 0    |      |
| P43      | 0    | 0    | 0    | 0    | 0    | 0    | 0    | 0    | 0    | 0    | 0    | 0    | 0    | 0    | 0    | 0    | 0    | 0    | 0    | 0    | 0    | 0    | 0    | 0    | 0    | 0    |      |
| P45      | 0    | 0    | 0    | 0    | 0    | 0    | 0    | 0    | 0    | 0    | 0    | 0    | 0    | 0    | 0    | 0    | 0    | 0    | 0    | 0    | 0    | 0    | 0    | 0    | 0    | 0    |      |
| P46      | 0    | 0    | 0    | 0    | 0    | 0    | 0.25 | 0    | 0.25 | 0    | 0.25 | 0    | 0    | 0    | 0    | 0    | 0    | 0    | 0    | 0    | 0    | 0    | 0    | 0    | 0    | 0    |      |
| P47      | NA   | 0    | 0    | 0    | 0    | 0    | 0    | 0.1  | 0    | 0    | 0    | 0    | 0    | 0    | 0    | 0    | 0    | 0    | 0    | 0    | 0    | NA   | NA   | NA   | NA   | NA   |      |
| P48      | NA   | 0    | 0    | 0    | 0    | 0    | 0    | 0    | 0    | 0    | 0    | 0    | 0    | 0    | 0    | 0    | 0    | 0    | 0    | 0    | 0    | 0    | NA   | NA   | NA   | NA   |      |
| P49      | NA   | 0    | 0    | 0    | 0    | 0    | 0    | 0    | 0    | 0    | 0    | 0    | 0    | 0    | 0    | 0    | 0    | 0    | 0    | 0    | 0    | NA   | NA   | NA   | NA   | NA   |      |
| P50      | 0.1  | 0.1  | 0.1  | 0.2  | 0.2  | 0.2  | 0.2  | 0.2  | 0.2  | 0.2  | 0.25 | 0.25 | 0.25 | 0.25 | 0.3  | 0.25 | 0.4  | 0.5  | 0.5  | 0.5  | 0.6  | NA   | NA   | 0.75 | 0.6  | 0.5  |      |
| P51      | 0    | 0    | 0    | 0    | 0    | 0    | 0    | 0    | 0    | 0    | 0    | 0    | 0    | 0    | 0    | 0    | 0    | 0    | 0    | NA   |      |
| P52      | NA   | 0    | 0    | 0    | 0    | 0    | 0    | 0    | 0    | 0    | 0    | 0    | 0    | 0    | 0    | 0    | 0    | 0    | 0    | 0    | 0    | 0    | 0    | 0    | 0    | 0    |      |
| P53      | NA   | 0    | 0    | 0    | 0    | 0    | 0    | 0    | 0    | 0    | 0    | 0    | 0    | 0    | 0    | 0    | 0    | 0    | 0    | 0    | 0    | 0    | 0    | 0    | 0    | 0    |      |

[illegible]

**Table S6.** DNA methylation analysis of CTCF2 in blood across the DM1 clinical subtypes

[illegible]

|              |        |    |    |    |      |      |   |      |      |    |    |      |    |
|--------------|--------|----|----|----|------|------|---|------|------|----|----|------|----|
|              | P27    | 0  | 0  | 0  | 0.05 | 0.05 | 0 | 0    | 0    | 0  | 0  | 0    | 0  |
|              | P28    | NA | NA | NA | 0    | 0    | 0 | 0    | 0    | 0  | 0  | 0    | 0  |
|              | P29    | NA | NA | NA | 0    | 0    | 0 | 0.2  | 0    | 0  | 0  | 0    | 0  |
|              | P30    | 0  | 0  | 0  | 0.05 | 0    | 0 | 0    | 0    | 0  | 0  | 0    | 0  |
|              | P31    | NA | NA | NA | 0.5  | 0.6  | 1 | 0.75 | 0.75 | 1  | 1  | 1    | 1  |
|              | P32    | 0  | 0  | 0  | 0    | 0    | 0 | 0    | 0    | 0  | 0  | 0    | 0  |
|              | P33    | 0  | 0  | 0  | 0    | 0    | 0 | 0    | 0    | 0  | 0  | 0    | 0  |
|              | P35    | 0  | 0  | 0  | 0    | 0    | 0 | 0    | 0    | 0  | 0  | 0    | 0  |
|              | P37    | 0  | 0  | 0  | 0    | 0    | 0 | 0    | 0    | 0  | 0  | 0    | 0  |
|              | P38    | 0  | 0  | 0  | 0    | 0    | 0 | 0    | 0    | 0  | 0  | 0    | 0  |
|              | P39    | 0  | 0  | 0  | 0    | 0    | 0 | 0    | 0    | 0  | 0  | 0.05 | 0  |
|              | P40    | 0  | 0  | 0  | 0    | 0    | 0 | 0    | 0    | 0  | 0  | 0    | 0  |
|              | P41    | 0  | 0  | 0  | 0    | 0    | 0 | 0    | 0    | 0  | 0  | 0    | 0  |
|              | P42    | 0  | 0  | 0  | 0    | 0    | 0 | 0    | 0    | 0  | 0  | 0    | 0  |
|              | P43    | 0  | 0  | 0  | 0    | 0    | 0 | 0    | 0    | 0  | 0  | 0    | 0  |
|              | P44    | NA | NA | NA | 0    | 0    | 0 | 0.5  | 0    | 0  | 0  | 0    | 0  |
|              | P45    | 0  | 0  | 0  | 0    | 0    | 0 | 0    | 0    | 0  | 0  | 0    | 0  |
|              | P48    | 0  | 0  | 0  | 0    | 0    | 0 | 0    | 0    | 0  | 0  | 0    | 0  |
|              | P49    | 0  | 0  | 0  | 0    | 0    | 0 | 0    | 0    | 0  | 0  | 0    | 0  |
|              | P50    | NA | NA | NA | 0    | 0    | 0 | 0    | 0    | 0  | 0  | 0    | 0  |
|              | P51    | NA | NA | NA | 0    | 0    | 0 | 0    | 0    | 0  | 0  | 0    | 0  |
|              | P52    | 0  | 0  | 0  | 0    | 0    | 0 | 0    | 0    | 0  | 0  | 0    | 0  |
|              | P53    | 0  | 0  | 0  | 0    | 0    | 0 | 0    | 0    | 0  | 0  | 0    | 0  |
|              | P54    | 0  | 0  | 0  | 0    | 0    | 0 | 0.1  | 0    | 0  | 0  | 0    | 0  |
| Late-onset   | P55    | 0  | 0  | 0  | 0    | 0    | 0 | 0    | 0    | NA | NA | NA   | NA |
|              | P56    | 0  | 0  | 0  | 0    | 0    | 0 | 0    | 0    | NA | NA | NA   | NA |
|              | P57    | 0  | 0  | 0  | 0    | 0    | 0 | 0    | 0    | 0  | 0  | 0    | 0  |
|              | P58    | 0  | 0  | 0  | 0    | 0    | 0 | 0    | 0    | 0  | 0  | 0    | 0  |
|              | P59    | 0  | 0  | 0  | 0    | 0    | 0 | 0    | 0    | 0  | 0  | 0    | 0  |
|              | P60    | 0  | 0  | 0  | 0    | 0    | 0 | 0.05 | 0    | 0  | 0  | 0    | 0  |
| Asymptomatic | P63    | 0  | 0  | 0  | 0    | 0    | 0 | 0.1  | 0    | 0  | 0  | 0    | 0  |
|              | P64    | 0  | 0  | 0  | 0    | 0    | 0 | 0    | 0    | NA | NA | NA   | NA |
|              | P65    | 0  | 0  | 0  | 0    | 0    | 0 | 0    | 0    | NA | NA | NA   | NA |
| Control      | Ctrl 1 | 0  | 0  | 0  | 0    | 0    | 0 | 0    | 0    | 0  | 0  | 0    | 0  |
|              | Ctrl 2 | 0  | 0  | 0  | 0    | 0    | 0 | 0    | 0    | 0  | 0  | 0    | 0  |
|              | Ctrl 3 | 0  | 0  | 0  | 0    | 0    | 0 | 0    | 0    | 0  | 0  | 0    | 0  |
|              | Ctrl 4 | 0  | 0  | 0  | 0    | 0    | 0 | 0    | 0    | 0  | 0  | 0    | 0  |
|              | Ctrl 5 | 0  | 0  | 0  | 0    | 0    | 0 | 0    | 0    | 0  | 0  | 0    | 0  |
|              | Ctrl 6 | 0  | 0  | 0  | 0    | 0    | 0 | 0    | 0    | 0  | 0  | 0    | 0  |
|              | Ctrl 7 | NA | 0  | 0  | 0    | 0    | 0 | 0    | 0    | 0  | 0  | 0    | 0  |

Range 0 to 1 indicates 0 to 100% methylation. NA = not available. P1-2= five year follow-up P1

**Table S7.** Clinical characteristics of congenital cases

| Patient | Methyl CTCF1/2 | Age of onset (years) | Age at sampling (years) | Gender | ePAL (CTGs) | Myotonia | Facial weakness | Axial weakness | Limb weakness     | MIRS | Cardiac involvement | NVM | Hyper-somnolence | Cataracts | mRS | DM1-ACTIV |
|---------|----------------|----------------------|-------------------------|--------|-------------|----------|-----------------|----------------|-------------------|------|---------------------|-----|------------------|-----------|-----|-----------|
| P1      | yes/no         | birth                | 10                      | female | 831         | no       | mild            | moderate       | moderate proximal | 4    | no                  | no  | no               | no        | 3   | 32        |
| P2      | yes/yes        | birth                | 18                      | male   | 587         | no       | severe          | mild           | severe proximal   | 5    | LAFB                | no  | U                | no        | 5   | 1         |
| P3      | yes/no         | birth                | 2                       | male   | 1011        | no       | moderate        | moderate       | NA                | 4    | no                  | no  | no               | no        | NA  | NA        |
| P4      | yes/no         | birth                | 16                      | male   | 730         | yes      | moderate        | mild           | moderate distal   | 3    | no                  | yes | no               | no        | 3   | 38        |

|           |         |       |    |        |     |     |         |          |                   |   |    |    |     |    |   |    |
|-----------|---------|-------|----|--------|-----|-----|---------|----------|-------------------|---|----|----|-----|----|---|----|
| <b>P5</b> | yes/yes | birth | 16 | male   | 222 | yes | unknown | none     | moderate distal   | 3 | no | no | no  | no | 2 | 40 |
| <b>P6</b> | yes/yes | birth | 15 | female | 280 | no  | mild    | moderate | moderate proximal | 4 | no | no | yes | no | 3 | 30 |

Methyl CTCF1/2= hypermethylated at the CTCF1 and CTCF2 site; ePAL= estimated progenitor allele size; NA = not applicable; U= unknown; AV = atrioventricular; LAFB = left anterior fascicular block; mRS = modified Rankin Scale; MIRS = Muscular Impairment Rating Scale; NMV = nocturnal mechanical ventilation.

**Table S8.** Clinical characteristics of juvenile cases

| <i>Patient</i> | <i>Methyl CTCF1/2</i> | <i>Age of onset (years)</i> | <i>Age at sampling (years)</i> | <i>Gender</i> | <i>ePAL (CTGs)</i> | <i>Myotonia</i> | <i>Facial weakness</i> | <i>Axial weakness</i> | <i>Limb weakness</i>          | <i>MIRS</i> | <i>Cardiac involvement</i> | <i>NVM</i> | <i>Hyper-somnolence</i> | <i>Cataracts</i> | <i>mRS</i> | <i>DM1-ACTIV</i> |
|----------------|-----------------------|-----------------------------|--------------------------------|---------------|--------------------|-----------------|------------------------|-----------------------|-------------------------------|-------------|----------------------------|------------|-------------------------|------------------|------------|------------------|
| <b>P13</b>     | no/no                 | 15                          | 39                             | female        | 286                | yes             | mild                   | none                  | mild/moderate proximal+distal | 4           | LAFB                       | no         | yes                     | no               | 2          | U                |
| <b>P14</b>     | no/no                 | 12                          | 22                             | male          | NA                 | yes             | none                   | none                  | none                          | 2           | NA                         | no         | no                      | no               | 1          | 40               |
| <b>P15</b>     | no/no                 | 18                          | 54                             | female        | 392                | yes             | moderate               | U                     | mild/moderate proximal+distal | 4           | 1° AV block                | no         | no                      | yes              | 3          | 13               |
| <b>P16</b>     | no/no                 | 11                          | 12                             | male          | 517                | yes             | U                      | U                     | none                          | 2           | no                         | no         | U                       | no               | 1          | 36               |
| <b>P17</b>     | no/no                 | 16                          | 19                             | female        | 273                | yes             | mild                   | U                     | mild distal                   | 1           | no                         | no         | no                      | no               | 1          | 40               |
| <b>P18</b>     | no/no                 | 11                          | 16                             | female        | 222                | yes             | none                   | none                  | mild distal                   | 2           | no                         | no         | no                      | no               | 1          | 40               |
| <b>P19</b>     | yes/yes               | 15                          | 26                             | female        | U                  | yes             | none                   | none                  | none                          | 2           | no                         | no         | yes                     | no               | 1          | 39               |
| <b>P20</b>     | yes/yes               | 15                          | 24                             | male          | 189                | yes             | none                   | none                  | none                          | 2           | no                         | no         | no                      | no               | 3          | 37               |
| <b>P21</b>     | no/no                 | 12                          | 40                             | female        | 428                | yes             | mild                   | moderate              | mild distal                   | 3           | no                         | yes        | yes                     | no               | 2          | 18               |
| <b>P22</b>     | no/no                 | 19                          | 37                             | female        | 251                | yes             | mild                   | none                  | mild distal                   | 3           | no                         | no         | no                      | no               | 1          | 29               |
| <b>P23</b>     | no/no                 | 12                          | 14                             | female        | 642                | yes             | mild                   | none                  | none                          | 2           | no                         | no         | yes                     | no               | 1          | 40               |
| <b>P24</b>     | no/no                 | 14                          | 16                             | female        | 229                | yes             | mild                   | none                  | none                          | 2           | no                         | no         | no                      | no               | 1          | 40               |
| <b>P25</b>     | no/no                 |                             | 15                             | male          | 235                | yes             | none                   | none                  | none                          | 1           | 1°AV block                 | no         | no                      | no               | 0          | 40               |
| <b>P26</b>     | no/no                 | 15                          | 16                             | male          | 323                | yes             | mild                   | none                  | none                          | 2           | no                         | no         | no                      | no               | 1          | 40               |
| <b>P27</b>     | no/no                 | 16                          | 37                             | female        | 330                | yes             | mild                   | mild                  | mild/moderate proximal+distal | 4           | 1°AV block                 | no         | yes                     | yes              | 2          | 29               |
| <b>P28</b>     | no/no                 | 17                          | 45                             | male          | 236                | yes             | mild                   | U                     | mild/moderate proximal+distal | 3           | 1°AV block + LAFB          | yes        | no                      | no               | 3          | 24               |
| <b>P29</b>     | no/no                 | 18                          | 26                             | female        | 254                | yes             | none                   | none                  | none                          | 1           | no                         | no         | no                      | no               | 1          | 40               |
| <b>P30</b>     | no/no                 | 18                          | 24                             | male          | 274                | yes             | mild                   | none                  | mild distal                   | 2           | no                         | no         | yes                     | no               | 1          | 33               |
| <b>P31</b>     | yes/yes               | 16                          | 53                             | female        | 420                | yes             | mild                   | none                  | mild/moderate proximal+distal | 3           | no                         | no         | no                      | yes              | 2          | 27               |
| <b>P32</b>     | no/no                 | 15                          | 29                             | male          | 237                | yes             | moderate               | none                  | none                          | 2           | pacemaker                  | yes        | no                      | no               | 3          | 19               |
| <b>P33</b>     | no/no                 | 19                          | 24                             | male          | 228                | yes             | mild                   | none                  | mild distal                   | 2           | no                         | no         | yes                     | no               | 1          | 37               |
| <b>P34</b>     | no/no                 | 13                          | 20                             | female        | 368                | yes             | mild                   | none                  | mild distal                   | 2           | no                         | no         | yes                     | no               | 1          | 39               |
| <b>P35</b>     | no/no                 | 14                          | 15                             | male          | 318                | yes             | mild                   | none                  | none                          | 2           | no                         | no         | yes                     | no               | 1          | 39               |

Methyl CTCF1/2= hypermethylated at the CTCF1 and CTCF2 site; ePAL= estimated progenitor allele size; U= unknown; AV = atrioventricular; LAFB = left anterior fascicular block; mRS = modified Rankin Scale; MIRS = Muscular Impairment Rating Scale; NMV = nocturnal mechanical ventilation

**Table S9.** Logistic regression model ePAL/modal vs. Methylation status

| <i>Model</i> | <i>Variables</i>  | <i>OR</i> | <i>CI</i>   | <i>p-value</i> | <i>N</i> |
|--------------|-------------------|-----------|-------------|----------------|----------|
| <b>1</b>     | ePAL versus MetS  | 1.005     | 1.002-1.008 | 0.004          | 53       |
| <b>2</b>     | Modal versus MetS | 1.004     | 1.002-1.007 | 0.001          | 46       |

Significance is set at  $p \leq 0.05$ . ePAL= estimated progenitor allele size; MetS= methylation status



**Table S10.** DNA methylation analysis of CpGi 74 in lymphoblastoids

| CpG →                     |     | 1 | 2 | 3 | 4 | 5 | 6 | 7 | 8 | 9 | 10 | 11 | 12 | 13 | 14 | 15 | 16 | 17 | 18 | 19 |
|---------------------------|-----|---|---|---|---|---|---|---|---|---|----|----|----|----|----|----|----|----|----|----|
| <i>Congenital</i>         | P1  | 1 | 1 | 1 | 1 | 1 | 1 | 1 | 1 | 1 | 1  | 1  | 1  | 1  | 1  | 1  | 1  | 1  | 1  | 1  |
|                           | P2  | 1 | 1 | 1 | 1 | 1 | 1 | 1 | 1 | 1 | 1  | 1  | 1  | 1  | 1  | 1  | 1  | 1  | 1  | 1  |
|                           | P4  | 1 | 1 | 1 | 1 | 1 | 1 | 1 | 1 | 1 | 1  | 1  | 1  | 1  | 1  | 1  | 1  | 1  | 1  | 1  |
| <i>Childhood</i>          | P7  | 1 | 1 | 1 | 1 | 1 | 1 | 1 | 1 | 1 | 1  | 1  | 1  | 1  | 1  | 1  | 1  | 1  | 1  | 1  |
|                           | P8  | 1 | 1 | 1 | 1 | 1 | 1 | 1 | 1 | 1 | 1  | 1  | 1  | 1  | 1  | 1  | 1  | 1  | 1  | 1  |
|                           | P9  | 1 | 1 | 1 | 1 | 1 | 1 | 1 | 1 | 1 | 1  | 1  | 1  | 1  | 1  | 1  | 1  | 1  | 1  | 1  |
|                           | P10 | 1 | 1 | 1 | 1 | 1 | 1 | 1 | 1 | 1 | 1  | 1  | 1  | 1  | 1  | 1  | 1  | 1  | 1  | 1  |
|                           | P11 | 1 | 1 | 1 | 1 | 1 | 1 | 1 | 1 | 1 | 1  | 1  | 1  | 1  | 1  | 1  | 1  | 1  | 1  | 1  |
| <i>Juvenile</i>           | P13 | 1 | 1 | 1 | 1 | 1 | 1 | 1 | 1 | 1 | 1  | 1  | 1  | 1  | 1  | 1  | 1  | 1  | 1  | 1  |
|                           | P20 | 1 | 1 | 1 | 1 | 1 | 1 | 1 | 1 | 1 | 1  | 1  | 1  | 1  | 1  | 1  | 1  | 1  | 1  | 1  |
| <i>Adult</i>              | P36 | 1 | 1 | 1 | 1 | 1 | 1 | 1 | 1 | 1 | 1  | 1  | 1  | 1  | 1  | 1  | 1  | 1  | 1  | 1  |
|                           | P38 | 1 | 1 | 1 | 1 | 1 | 1 | 1 | 1 | 1 | 1  | 1  | 1  | 1  | 1  | 1  | 1  | 1  | 1  | 1  |
| <i>Late-onset Control</i> | P56 | 1 | 1 | 1 | 1 | 1 | 1 | 1 | 1 | 1 | 1  | 1  | 1  | 1  | 1  | 1  | 1  | 1  | 1  | 1  |
|                           | C1  | 1 | 1 | 1 | 1 | 1 | 1 | 1 | 1 | 1 | 1  | 1  | 1  | 1  | 1  | 1  | 1  | 1  | 1  | 1  |
|                           | C4  | 1 | 1 | 1 | 1 | 1 | 1 | 1 | 1 | 1 | 1  | 1  | 1  | 1  | 1  | 1  | 1  | 1  | 1  | 1  |
|                           | C5  | 1 | 1 | 1 | 1 | 1 | 1 | 1 | 1 | 1 | 1  | 1  | 1  | 1  | 1  | 1  | 1  | 1  | 1  | 1  |
|                           | C6  | 1 | 1 | 1 | 1 | 1 | 1 | 1 | 1 | 1 | 1  | 1  | 1  | 1  | 1  | 1  | 1  | 1  | 1  | 1  |

Range 0 to 1 indicates 0 to 100% methylation.

**Table S11.** DNA methylation analysis of CpGi 43 in lymphoblastoids

| CpG →                     |     | 1 | 2 | 3 | 4 | 5   | 6 | 7 | 8 | 9 | 10 | 11 | 12 | 13  | 14   | 15   |
|---------------------------|-----|---|---|---|---|-----|---|---|---|---|----|----|----|-----|------|------|
| <i>Congenital</i>         | P1  | 0 | 0 | 0 | 0 | 0   | 0 | 0 | 0 | 0 | 0  | 0  | 0  | 0   | 0.35 | 0.3  |
|                           | P2  | 0 | 0 | 0 | 0 | 0   | 0 | 0 | 0 | 0 | 0  | 0  | 0  | 0   | 0    | 0.25 |
|                           | P4  | 0 | 0 | 0 | 0 | 0   | 0 | 0 | 0 | 0 | 0  | 0  | 0  | 0   | 0    | 0.15 |
| <i>Childhood</i>          | P7  | 0 | 0 | 0 | 0 | 0   | 0 | 0 | 0 | 0 | 0  | 0  | 0  | 0.1 | 0    | 0.2  |
|                           | P8  | 0 | 0 | 0 | 0 | 0   | 0 | 0 | 0 | 0 | 0  | 0  | 0  | 0   | 0    | 0    |
|                           | P9  | 0 | 0 | 0 | 0 | 0   | 0 | 0 | 0 | 0 | 0  | 0  | 0  | 0   | 0    | 0.3  |
|                           | P10 | 0 | 0 | 0 | 0 | 0   | 0 | 0 | 0 | 0 | 0  | 0  | 0  | 0   | 0    | 0    |
|                           | P11 | 0 | 0 | 0 | 0 | 0   | 0 | 0 | 0 | 0 | 0  | 0  | 0  | 0   | 0.3  | 0.6  |
| <i>Juvenile</i>           | P13 | 0 | 0 | 0 | 0 | 0   | 0 | 0 | 0 | 0 | 0  | 0  | 0  | 0   | 0.2  | 0.2  |
|                           | P20 | 0 | 0 | 0 | 0 | 0   | 0 | 0 | 0 | 0 | 0  | 0  | 0  | 0   | 0    | 0    |
| <i>Adult</i>              | P36 | 0 | 0 | 0 | 0 | 0   | 0 | 0 | 0 | 0 | 0  | 0  | 0  | 0   | 0    | 0    |
|                           | P38 | 0 | 0 | 0 | 0 | 0   | 0 | 0 | 0 | 0 | 0  | 0  | 0  | 0   | 0    | 0    |
| <i>Late-onset Control</i> | P56 | 0 | 0 | 0 | 0 | 0.2 | 0 | 0 | 0 | 0 | 0  | 0  | 0  | 0   | 0.4  | 0.3  |
|                           | C1  | 0 | 0 | 0 | 0 | 0   | 0 | 0 | 0 | 0 | 0  | 0  | 0  | 0   | 0    | 0    |
|                           | C4  | 0 | 0 | 0 | 0 | 0   | 0 | 0 | 0 | 0 | 0  | 0  | 0  | 0   | 0.45 | 0.45 |
|                           | C5  | 0 | 0 | 0 | 0 | 0   | 0 | 0 | 0 | 0 | 0  | 0  | 0  | 0   | 0    | 0    |
|                           | C6  | 0 | 0 | 0 | 0 | 0   | 0 | 0 | 0 | 0 | 0  | 0  | 0  | 0   | 0    | 0    |

Range 0 to 1 indicates 0 to 100% methylation.

**Table S12.** DNA methylation analysis of CpGi 36 in lymphoblastoids

| CpG →             | 1   | 2 | 3 | 4 | 5 | 6 | 7 | 8   | 9 | 10  | 11 | 12 | 13 | 14 | 15  | 16  | 17 |
|-------------------|-----|---|---|---|---|---|---|-----|---|-----|----|----|----|----|-----|-----|----|
| <b>Congenital</b> | P2  | 1 | 1 | 1 | 1 | 1 | 1 | 1   | 1 | 1   | 1  | 1  | 1  | 1  | 0.8 | 1   | 1  |
|                   | P4  | 1 | 1 | 1 | 1 | 1 | 1 | 1   | 1 | 1   | 1  | 1  | 1  | 1  | 0.9 | 0.9 | 1  |
| <b>Childhood</b>  | P7  | 1 | 1 | 1 | 1 | 1 | 1 | 1   | 1 | 1   | 1  | 1  | 1  | 1  | 1   | 1   | 1  |
|                   | P8  | 1 | 1 | 1 | 1 | 1 | 1 | 1   | 1 | 1   | 1  | 1  | 1  | 1  | 1   | 1   | 1  |
|                   | P9  | 1 | 1 | 1 | 1 | 1 | 1 | 1   | 1 | 1   | 1  | 1  | 1  | 1  | 1   | 1   | 1  |
|                   | P10 | 1 | 1 | 1 | 1 | 1 | 1 | 1   | 1 | 1   | 1  | 1  | 1  | 1  | 0.9 | 0.9 | 1  |
| <b>Juvenile</b>   | P13 | 1 | 1 | 1 | 1 | 1 | 1 | 1   | 1 | 1   | 1  | 1  | 1  | 1  | 0.9 | 0.9 | 1  |
| <b>Adult</b>      | P36 | 1 | 1 | 1 | 1 | 1 | 1 | 1   | 1 | 1   | 1  | 1  | 1  | 1  | 1   | 0.9 | 1  |
|                   | P38 | 1 | 1 | 1 | 1 | 1 | 1 | 1   | 1 | 1   | 1  | 1  | 1  | 1  | 0.9 | 0.9 | 1  |
| <b>Late-onset</b> | P56 | 1 | 1 | 1 | 1 | 1 | 1 | 1   | 1 | 1   | 1  | 1  | 1  | 1  | 1   | 1   | 1  |
| <b>Control</b>    | C4  | 1 | 1 | 1 | 1 | 1 | 1 | 1   | 1 | 1   | 1  | 1  | 1  | 1  | 0.9 | 0.8 | 1  |
|                   | C5  | 1 | 1 | 1 | 1 | 1 | 1 | 1   | 1 | 0.8 | 1  | 1  | 1  | 1  | 0.9 | 0.9 | 1  |
|                   | C6  | 1 | 1 | 1 | 1 | 1 | 1 | 0.8 | 1 | 1   | 1  | 1  | 1  | 1  | 0.8 | 0.8 | 1  |

Range 0 to 1 indicates 0 to 100% methylation.

**Table S13.** DNA methylation analysis of CTCF1 in lymphoblastoids

| CpG →             | 1   | 2    | 3    | 4    | 5   | 6   | 7    | 8    | 9   | 10   | 11   | 12  | 13  | 14   | 15   | 16   | 17  | 18   | 19   | 20   | 21   | 22   | 23   | 24   | 25   |
|-------------------|-----|------|------|------|-----|-----|------|------|-----|------|------|-----|-----|------|------|------|-----|------|------|------|------|------|------|------|------|
| <b>Congenital</b> | P1  | 0.25 | 0.25 | 0.25 | 0.4 | 0.5 | 0.5  | 0.5  | 0.5 | 0.5  | 0.5  | 0.5 | 0.5 | 0.5  | 0.5  | 0.45 | 0.5 | 0.5  | 0.6  | 0.4  | 0.6  | 0.75 | 0.75 | 0.75 | 0.75 |
|                   | P2  | 0.2  | 0.2  | 0.2  | 0.3 | 0.3 | 0.45 | 0.4  | 0.4 | 0.45 | 0.45 | 0.5 | 0.4 | 0.4  | 0.5  | 0.4  | 0.6 | 0.55 | 0.55 | 0.45 | 0.6  | 0.75 | 0.75 | 0.75 | 0.8  |
| <b>Childhood</b>  | P4  | 0.1  | 0.1  | 0.1  | 0.1 | 0.1 | 0.1  | 0.2  | 0.1 | 0.1  | 0.1  | 0.1 | 0.1 | 0.1  | 0.15 | 0.1  | 0.1 | 0.1  | 0.1  | 0.2  | 0.25 | 0.25 | 0.2  | 0.3  | 0.25 |
|                   | P7  | 0    | 0    | 0    | 0   | 0   | 0    | 0    | 0   | 0    | 0    | 0   | 0   | 0    | 0    | 0    | 0   | 0    | 0    | 0    | 0    | 0    | 0    | 0    | 0    |
|                   | P8  | 0    | 0    | 0    | 0   | 0   | 0    | 0    | 0   | 0    | 0    | 0   | 0   | 0    | 0    | 0    | 0   | 0    | 0    | 0    | 0    | 0    | 0    | 0    | 0    |
|                   | P9  | 0    | 0    | 0    | 0   | 0   | 0    | 0    | 0   | 0    | 0    | 0   | 0   | 0    | 0    | 0    | 0   | 0    | 0    | 0    | 0    | 0    | 0    | 0    | 0    |
|                   | P10 | 0.25 | 0.25 | 0.25 | 0.5 | 0.4 | 0.4  | 0.45 | 0.5 | 0.5  | 0.5  | 0.5 | 0.5 | 0.65 | 0.5  | 0.75 | 0.5 | 0.55 | 0.45 | 0.55 | 0.75 | 0.8  | 0.8  | 0.8  | 0.75 |
| <b>Juvenile</b>   | P11 | 0    | 0    | 0    | 0   | 0   | 0    | 0    | 0   | 0    | 0    | 0   | 0   | 0    | 0    | 0    | 0   | 0    | 0    | 0    | 0    | 0    | 0    | 0    | 0    |
|                   | P13 | 0    | 0    | 0    | 0   | 0   | 0    | 0    | 0   | 0    | 0    | 0   | 0   | 0    | 0    | 0    | 0   | 0    | 0    | 0    | 0    | 0    | 0    | 0    | 0    |
| <b>Adult</b>      | P20 | 0.2  | 0.2  | 0.2  | 0.4 | 0.3 | 0.3  | 0.3  | 0.4 | 0.4  | 0.35 | 0.4 | 0.4 | 0.4  | 0.45 | 0.5  | 0.5 | 0.55 | 0.5  | 0.75 | 0.75 | 0.75 | 0.75 | 0.7  | 0.7  |
|                   | P36 | 0    | 0    | 0    | 0   | 0   | 0    | 0    | 0   | 0    | 0    | 0   | 0   | 0    | 0    | 0    | 0   | 0    | 0    | 0    | 0    | 0    | 0    | 0    | 0    |
|                   | P38 | 0    | 0    | 0    | 0   | 0   | 0    | 0    | 0   | 0    | 0    | 0   | 0   | 0    | 0    | 0    | 0   | 0    | 0    | 0    | 0    | 0    | 0    | 0    | 0    |
| <b>Late-onset</b> | P56 | 0    | 0    | 0    | 0   | 0   | 0    | 0    | 0   | 0    | 0    | 0   | 0   | 0    | 0    | 0    | 0   | 0    | 0    | 0    | 0    | 0    | 0    | 0    | 0    |
| <b>Control</b>    | C1  | 0    | 0    | 0    | 0   | 0   | 0    | 0    | 0   | 0    | 0    | 0   | 0   | 0    | 0    | 0    | 0   | 0    | 0    | 0    | 0    | 0    | 0    | 0    | 0    |
|                   | C4  | 0    | 0    | 0    | 0   | 0   | 0    | 0    | 0   | 0    | 0    | 0   | 0   | 0    | 0    | 0    | 0   | 0    | 0    | 0    | 0    | 0    | 0    | 0    | 0    |
|                   | C5  | 0    | 0    | 0    | 0   | 0   | 0    | 0    | 0   | 0    | 0    | 0   | 0   | 0    | 0    | 0    | 0   | 0    | 0    | 0    | 0    | 0    | 0    | 0    | 0    |
|                   | C6  | 0    | 0    | 0    | 0   | 0   | 0    | 0    | 0   | 0    | 0    | 0   | 0   | 0    | 0    | 0    | 0   | 0    | 0    | 0    | 0    | 0    | 0    | 0    | 0    |

Range 0 to 1 indicates 0 to 100% methylation.

**Table S14.** DNA methylation analysis of CTCF2 in lymphoblastoids

| CpG →             | 1   | 2  | 3 | 4 | 5    | 6    | 7   | 8    | 9    | 10   | 11   |
|-------------------|-----|----|---|---|------|------|-----|------|------|------|------|
| <b>Congenital</b> | P2  | NA | 0 | 0 | 0.1  | 0.1  | 0.1 | 0.15 | 0.1  | 0.15 | 0.2  |
|                   | P4  | NA | 0 | 0 | 0.1  | 0.1  | 0.1 | 0.1  | 0.1  | 0.15 | 0.15 |
| <b>Childhood</b>  | P7  | NA | 0 | 0 | 0    | 0.15 | 0   | 0    | 0.05 | 0.05 | 0.05 |
|                   | P8  | 0  | 0 | 0 | 0    | 0    | 0   | 0    | 0    | 0    | 0    |
|                   | P9  | NA | 0 | 0 | 0    | 0    | 0   | 0.05 | 0.05 | 0.05 | 0.05 |
|                   | P10 | NA | 0 | 0 | 0.05 | 0.1  | 0.1 | 0.1  | 0.1  | 0.15 | 0.1  |
|                   | P11 | NA | 0 | 0 | 0    | 0.05 | 0   | 0    | 0    | 0.5  | 0.1  |

|            |     |    |   |   |     |     |     |      |     |     |     |      |
|------------|-----|----|---|---|-----|-----|-----|------|-----|-----|-----|------|
| Juvenile   | P13 | 0  | 0 | 0 | 0   | 0   | 0   | 0    | 0   | 0   | 0   | 0    |
|            | P20 | NA | 0 | 0 | 0.1 | 0.1 | 0.2 | 0.05 | 0.1 | 0.1 | 0.1 | 0.15 |
|            | P36 | 0  | 0 | 0 | 0   | 0   | 0   | 0    | 0   | 0   | 0   | 0    |
| Adult      | P38 | 0  | 0 | 0 | 0   | 0   | 0   | 0    | 0   | 0   | 0   | 0    |
|            | P56 | 0  | 0 | 0 | 0   | 0   | 0   | 0    | 0   | 0   | 0   | 0    |
| Late-onset | C1  | 0  | 0 | 0 | 0   | 0   | 0   | 0    | 0   | 0   | 0   | 0    |
| Control    | C4  | 0  | 0 | 0 | 0   | 0   | 0   | 0    | 0   | 0   | 0   | 0    |
|            | C5  | 0  | 0 | 0 | 0   | 0   | 0   | 0    | 0   | 0   | 0   | 0    |
|            | C6  | 0  | 0 | 0 | 0   | 0   | 0   | 0    | 0   | 0   | 0   | 0    |

Range 0 to 1 indicates 0 to 100% methylation. NA = not available

**Table S15.** DNA methylation analysis of CpGi 74 in skin and skin-derived cells

|                  |          | CpG → | 1    | 2    | 3 | 4 | 5   | 6    | 7    | 8    | 9    | 10 | 11 | 12 | 13 | 14   | 15 | 16  | 17   | 18 | 19   |      |
|------------------|----------|-------|------|------|---|---|-----|------|------|------|------|----|----|----|----|------|----|-----|------|----|------|------|
| Skin             | Adult    | P37   | 1    | 0.85 | 1 | 1 | 0.7 | 1    | 0.75 | 1    | 1    | 1  | 1  | 1  | 1  | 1    | 1  | 0.7 | 1    | 1  | 1    |      |
|                  |          | P68   | 1    | 0.75 | 1 | 1 | 1   | 1    | 1    | 1    | 1    | 1  | 1  | 1  | 1  | 1    | 1  | 1   | 0.5  | 1  | 1    | 1    |
|                  |          | P69   | 0.75 | 1    | 1 | 1 | 1   | 1    | 1    | 0.95 | 1    | 1  | 1  | 1  | 1  | 1    | 1  | 1   | 0.7  | 1  | 1    | 1    |
|                  | Control  | C2    | 1    | 0.75 | 1 | 1 | 1   | 0.9  | 0.75 | 0.9  | 1    | 1  | 1  | 1  | 1  | 1    | 1  | 1   | 0.6  | 1  | 0.8  | 0.8  |
|                  |          | C10   | 1    | 0.8  | 1 | 1 | 1   | 0.75 | 0.8  | 0.8  | 1    | 1  | 1  | 1  | 1  | 1    | 1  | 1   | 0.75 | 1  | 0.95 | 0.95 |
| Skin fibroblasts |          |       |      |      |   |   |     |      |      |      |      |    |    |    |    |      |    |     |      |    |      |      |
| Skin fibroblasts | Juvenile | P13   | 1    | 1    | 1 | 1 | 1   | 1    | 1    | 1    | 1    | 1  | 1  | 1  | 1  | 1    | 1  | 0.5 | 1    | 1  | 1    |      |
|                  | Adult    | P36   | 1    | 1    | 1 | 1 | 1   | 1    | 1    | 1    | 1    | 1  | 1  | 1  | 1  | 1    | 1  | 1   | 1    | 1  | 1    |      |
|                  |          | P38   | 1    | 1    | 1 | 1 | 1   | 1    | 1    | 1    | 1    | 1  | 1  | 1  | 1  | 1    | 1  | 1   | 1    | 1  | 1    |      |
|                  | Control  | C2    | 1    | 1    | 1 | 1 | 1   | 1    | 1    | 1    | 1    | 1  | 1  | 1  | 1  | 1    | 1  | 1   | 1    | 1  | 1    |      |
|                  |          | C6    | 1    | 1    | 1 | 1 | 1   | 1    | 1    | 1    | 1    | 1  | 1  | 1  | 1  | 1    | 1  | 1   | 0.75 | 1  | 1    |      |
|                  |          | C9    | 1    | 1    | 1 | 1 | 1   | 1    | 1    | 1    | 0.75 | 1  | 1  | 1  | 1  | 0.75 | 1  | 1   | 0.75 | 1  | 1    | 1    |
|                  |          |       |      |      |   |   |     |      |      |      |      |    |    |    |    |      |    |     |      |    |      |      |

Range 0 to 1 indicates 0 to 100% methylation.

**Table S16.** DNA methylation analysis of CpGi 74 in muscle and muscle-derived cells

|            | CpG → | 1    | 2    | 3    | 4    | 5    | 6    | 7    | 8    | 9    | 10   | 11  | 12  | 13  | 14  | 15   | 16   | 17 | 18   | 19   |
|------------|-------|------|------|------|------|------|------|------|------|------|------|-----|-----|-----|-----|------|------|----|------|------|
| Muscle     |       |      |      |      |      |      |      |      |      |      |      |     |     |     |     |      |      |    |      |      |
| Juvenile   | P13   | 1    | 0.75 | 1    | 1    | 0.75 | 1    | 0.65 | 1    | 0.85 | 0.9  | 0.9 | 1   | 1   | 1   | 1    | 0.5  | 1  | 1    | 1    |
| Adult      | P37   | 1    | 0.75 | 1    | 1    | 0.73 | 0.9  | 0.55 | 0.9  | 1    | 1    | 1   | 1   | 1   | 1   | 1    | 0.85 | 1  | 1    | 1    |
|            | P68   | 0    | 0.5  | 1    | 0.6  | 0.75 | 0.75 | 0.4  | 0.83 | 0.83 | 0.83 | 1   | 0.9 | 1   | 1   | 1    | 0.6  | 1  | 1    | 1    |
| Late-onset | P56   | 0.68 | 0.75 | 1    | 0.95 | 0.73 | 0.9  | 0.55 | 0.85 | 1    | 0.9  | 1   | 1   | 1   | 1   | 1    | 0.75 | 1  | 1    | 1    |
|            | P67   | 0.4  | 0.75 | 0.75 | 1    | 0.95 | 1    | 0.75 | 1    | 1    | 1    | 1   | 1   | 1   | 1   | 0.9  | 0.2  | 1  | 1    | 1    |
| Control    | C6    | 1    | 1    | 1    | 1    | 1    | 1    | 1    | 0.85 | 1    | 1    | 0.5 | 1   | 1   | 1   | 1    | 0.5  | 1  | 0.7  | 1    |
|            | C9    | 1    | 0.67 | 1    | 1    | 0.8  | 1    | 0.6  | 0.9  | 1    | 1    | 1   | 1   | 1   | 1   | 1    | 0.8  | 1  | 0.9  | 0.9  |
| Myoblasts  |       |      |      |      |      |      |      |      |      |      |      |     |     |     |     |      |      |    |      |      |
| Adult      | P36   | 1    | 1    | 1    | NA   | NA   | NA   | NA   | 1    | 1    | NA   | NA  | 1   | 1   | 1   | 1    | 1    | 1  | 1    | 1    |
|            | P37   | 1    | 1    | 1    | 1    | 1    | 1    | 0.75 | 0.75 | 1    | 0.9  | 0.8 | 0.9 | 1   | 1   | 0.87 | 0.8  | 1  | 1    | 1    |
|            | P38   | 1    | 1    | 1    | 1    | 1    | 1    | 1    | 1    | 1    | 1    | 1   | 1   | 1   | 1   | 1    | 1    | 1  | 1    | 1    |
| Late-onset | P56   | 1    | 1    | 1    | NA   | NA   | 1    | 0.95 | 1    | 1    | 1    | 1   | 1   | 0.9 | 0.9 | 1    | 1    | 1  | 0.9  | 0.8  |
| Control    | C2    | 1    | 0.75 | 1    | NA   | NA   | 1    | 0.8  | 1    | 1    | 1    | 1   | 1   | 1   | 1   | 1    | 0.8  | 1  | 1    | 1    |
|            | C3    | NA   | 0.73 | 1    | NA   | NA   | NA   | NA   | 1    | 1    | 1    | 1   | 1   | 1   | 1   | 1    | 1    | 1  | 1    | 1    |
|            | C9    | 1    | 1    | 1    | NA   | NA   | NA   | 0.9  | 1    | 1    | 1    | 1   | 1   | 1   | 1   | 1    | 0.8  | 1  | 1    | 1    |
|            | C10   | 1    | 0.75 | 1    | NA   | NA   | NA   | 0.8  | 1    | 0.8  | 0.9  | 1   | 1   | 0.9 | 0.9 | 1    | 1    | 1  | 0.87 | 0.87 |
| Myotubes   |       |      |      |      |      |      |      |      |      |      |      |     |     |     |     |      |      |    |      |      |
| Juvenile   | P13   | NA   | 0.4  | 1    | NA   | NA   | 1    | 0.75 | 0.65 | 1    | 1    | 1   | 1   | 1   | 1   | 1    | 0.5  | 1  | 1    | 1    |

|       |     |    |     |   |    |      |    |      |      |      |      |      |   |   |   |     |      |     |      |      |     |
|-------|-----|----|-----|---|----|------|----|------|------|------|------|------|---|---|---|-----|------|-----|------|------|-----|
| Adult | P36 | 1  | 1   | 1 | 1  | 0.9  | 1  | 1    | 0.8  | 1    | 1    | 1    | 1 | 1 | 1 | 1   | 1    | 1   | 1    | 1    | 1   |
|       | P37 | 1  | 0.5 | 1 | 1  | 0.75 | 1  | 0.75 | 0.75 | 0.75 | 1    | 1    | 1 | 1 | 1 | 1   | 1    | 0.6 | 1    | 1    | 1   |
|       | P38 | 1  | 1   | 1 | NA | NA   | NA | 0.5  | 0.9  | 1    | 1    | 1    | 1 | 1 | 1 | 1   | 0.9  | 1   | NA   | 1    | 1   |
|       | P56 | 1  | 1   | 1 | NA | NA   | 1  | 1    | 1    | 1    | 1    | 1    | 1 | 1 | 1 | 1   | 1    | 1   | 1    | 1    | 1   |
|       | C2  | 1  | 1   | 1 | NA | NA   | 1  | 0.75 | 1    | 1    | 0.9  | 1    | 1 | 1 | 1 | 1   | 1    | 1   | 1    | 1    | 1   |
|       | C4  | 1  | 0.9 | 1 | NA | NA   | 1  | 0.9  | 0.8  | 1    | 1    | 1    | 1 | 1 | 1 | 1   | 0.75 | 1   | 1    | 1    | 1   |
|       | C6  | NA | 1   | 1 | 1  | 1    | 1  | 1    | 0.9  | 1    | 0.95 | 0.95 | 1 | 1 | 1 | 0.9 | 0.75 | 0.8 | 0.85 | 0.85 | 1   |
|       | C9  | NA | 1   | 1 | NA | NA   | NA | 0.75 | 0.75 | 1    | 1    | 1    | 1 | 1 | 1 | 0.9 | 0.9  | 0.7 | 1    | 0.8  | 0.9 |
|       |     |    |     |   |    |      |    |      |      |      |      |      |   |   |   |     |      |     |      |      |     |

**Table S17.** DNA methylation analysis of CpGi 36 in skin and skin-derived cells

[illegible]

**Table S18.** DNA methylation analysis of CpGi 36 in muscle and muscle-derived cells

[illegible]

|                   |            |   |     |      |      |     |      |     |      |   |   |     |     |   |     |     |      |     |
|-------------------|------------|---|-----|------|------|-----|------|-----|------|---|---|-----|-----|---|-----|-----|------|-----|
| <b>Controls</b>   | <b>C3</b>  | 1 | 0.7 | 1    | 1    | 1   | 1    | 1   | 0.7  | 1 | 1 | 1   | 1   | 1 | 1   | 1   | 1    | 0.9 |
|                   | <b>C9</b>  | 1 | 0.7 | 1    | 1    | 1   | 1    | 1   | 1    | 1 | 1 | 1   | 1   | 1 | 1   | 1   | 0.9  | 1   |
|                   | <b>C10</b> | 1 | 0.8 | 1    | 1    | 1   | 1    | 1   | 1    | 1 | 1 | 1   | 1   | 1 | 1   | 1   | 1    | 1   |
| <b>Myotubes</b>   |            |   |     |      |      |     |      |     |      |   |   |     |     |   |     |     |      |     |
| <b>Juvenile</b>   | <b>P13</b> | 1 | 1   | 1    | 1    | 1   | 1    | 1   | 1    | 1 | 1 | 0.8 | 1   | 1 | 1   | 0.6 | 0.9  | 0.8 |
|                   | <b>P36</b> | 1 | 1   | 1    | 1    | 1   | 1    | 1   | 0.7  | 1 | 1 | 1   | 1   | 1 | 0.7 | 0.7 | 0.8  | 0.9 |
| <b>Adult</b>      | <b>P37</b> | 1 | 0.5 | 0.75 | 0.75 | 1   | 0.55 | 1   | 0.55 | 1 | 1 | 0.8 | 1   | 1 | 1   | 0.7 | 1    | 1   |
|                   | <b>P38</b> | 1 | 0.6 | 1    | 1    | 1   | 1    | 1   | 0.75 | 1 | 1 | 1   | 1   | 1 | 0.8 | 1   | 0.9  | 1   |
| <b>Late-onset</b> | <b>P56</b> | 1 | 1   | 1    | 1    | 1   | 1    | 0.7 | 1    | 1 | 1 | 1   | 1   | 1 | 1   | 1   | 1    | 0.6 |
|                   | <b>C2</b>  | 1 | 1   | 1    | 1    | 0.9 | 0.8  | 1   | 0.7  | 1 | 1 | 1   | 0.9 | 1 | 1   | 1   | 0.91 |     |
| <b>Control</b>    | <b>C4</b>  | 1 | 0.6 | 1    | 1    | 1   | 1    | 1   | 0.9  | 1 | 1 | 1   | 1   | 1 | 0.8 | 0.9 | 1    | 0.9 |
|                   | <b>C6</b>  | 1 | 0.7 | 1    | 1    | 1   | 1    | 1   | 1    | 1 | 1 | 1   | 1   | 1 | 1   | 1   | 1    | 0.6 |
|                   | <b>C9</b>  | 1 | 0.7 | 1    | 1    | 1   | 0.7  | 1   | 0.9  | 1 | 1 | 1   | 1   | 1 | 1   | 1   | 0.8  | 0.8 |

Range 0 to 1 indicates 0 to 100% methylation. NA = not available

**Table S19.** DNA methylation analysis of CpGi 43 in skin and skin-derived cells

|                  |          | CpG → | 1   | 2    | 3    | 4    | 5    | 6    | 7    | 8    | 9    | 10  | 11   | 12  | 13   | 14   | 15   |
|------------------|----------|-------|-----|------|------|------|------|------|------|------|------|-----|------|-----|------|------|------|
| Skin             | Adult    | P37   | 0   | 0    | 0    | 0    | 0    | 0.15 | 0    | 0.05 | 0.05 | NA  | NA   | 0   | 0    | 0    | 0    |
|                  |          | P68   | 0   | 0    | 0    | 0    | 0    | 0    | 0    | 0    | 0    | 0   | 0    | 0   | 0    | 0    | 0    |
|                  |          | P69   | 0   | 0    | 0    | 0    | 0    | 0.7  | 0    | 0    | 0    | 0   | 0    | 0   | 0    | 0    | 0    |
|                  | Control  | C2    | 0   | 0    | 0    | 0    | 0.05 | 0.1  | 0.05 | 0    | 0.05 | 0   | 0    | 0   | 0.1  | 0.1  | 0.1  |
|                  |          | C10   | 0   | 0    | 0    | 0.05 | 0    | 0.1  | 0.05 | 0.05 | 0.05 | 0.1 | 0.1  | 0.1 | 0.1  | 0    | 0.1  |
| Skin fibroblasts |          |       |     |      |      |      |      |      |      |      |      |     |      |     |      |      |      |
|                  | Juvenile | P13   | 0   | 0    | 0    | 0    | 0    | 0    | 0    | 0    | 0.05 | 0.4 | 0    | 0   | NA   | NA   | 0.4  |
|                  | Adult    | P36   | 0.2 | 0.25 | 0.5  | 0    | 0.25 | 0    | 0    | 0    | 0.4  | 0.5 | 0    | 0   | 0.5  | 0.05 | 0.8  |
|                  |          | P37   | 0   | 0    | 0.05 | 0    | 0    | 0.05 | 0.05 | 0.05 | 0.1  | 0.1 | 0.05 | 0.1 | 0.1  | NA   | NA   |
|                  | Control  | P38   | 0   | 0    | 0    | 0    | 0    | 0    | 0    | 0    | 0.5  | NA  | 0    | 0   | 0    | 0    | 0    |
|                  |          | C2    | 0   | 0    | 0.1  | 0    | 0.1  | 0    | 0.1  | 0.1  | 0.1  | 0.1 | 0.1  | 0.1 | 0.05 | 0.1  | 0.3  |
|                  |          | C5    | 1   | 0    | 0    | 0    | 0    | 0    | 0.6  | 0    | 0.75 | 0   | 0    | 0   | 0    | 0    | 0    |
|                  |          | C6    | 0   | 0    | 0.4  | 0    | 0.3  | 0    | 0    | NA   | 0.4  | 0.4 | 0.2  | NA  | 0    | 0.5  | 0.75 |
|                  |          | C9    | 0   | 0    | 0    | 0    | 0    | 0    | 0    | 0    | 0    | 0   | 0    | 0   | 0    | 0    | 0    |

Range 0 to 1 indicates 0 to 100% methylation. NA = not available

**Table S20.** DNA methylation analysis of CpGi 43 in muscle and muscle-derived cells

|                 |                   | CpG →      | 1    | 2    | 3    | 4    | 5    | 6    | 7    | 8    | 9    | 10   | 11   | 12   | 13   | 14   | 15   |
|-----------------|-------------------|------------|------|------|------|------|------|------|------|------|------|------|------|------|------|------|------|
| <b>Muscle</b>   |                   |            |      |      |      |      |      |      |      |      |      |      |      |      |      |      |      |
| <b>Juvenile</b> | <b>Adult</b>      | <b>P13</b> | 0.1  | 0    | 0.35 | 0    | 0.2  | 0.2  | 0.4  | 0.4  | 0.55 | 0.25 | 0    | 0.25 | 0.25 | 0.4  | 0.75 |
|                 |                   | <b>P36</b> | 0    | 0    | 0.4  | 0    | 0.4  | 1    | 0.75 | 0.5  | 0.5  | 1    | 0.6  | 0    | 1    | 0.5  | 1    |
|                 | <b>Control</b>    | <b>P37</b> | 0.25 | 0    | 0.5  | 0    | 0.4  | 0.4  | 0.5  | 0.5  | 0.75 | 0.75 | 0.5  | 0    | 0.75 | 0.75 | 0.8  |
|                 |                   | <b>P38</b> | 1    | 0    | 0.4  | 0.35 | 0.4  | 0.4  | 0.8  | 0.45 | 0.5  | 0.5  | 0.5  | 0.25 | 0    | 0.75 | 1    |
|                 | <b>Late-onset</b> | <b>P68</b> | 0    | 0    | 0    | 0    | 0    | 0.15 | 0    | 0    | 0.2  | 0    | 0.25 | 0.35 | 0    | 0.5  |      |
|                 |                   | <b>P56</b> | 0.2  | 0    | 0.25 | 0.25 | 0.25 | 0.25 | 0.4  | 0.4  | 0.55 | 0.5  | 0.5  | 0.4  | 0.4  | 0.4  | 0.65 |
|                 | <b>Control</b>    | <b>P67</b> | 0.35 | 0.25 | 0.25 | 0    | 0.05 | 0.35 | 0.35 | 1    | 0.75 | 1    | 0.45 | 0.45 | 0.75 | 0.1  | 0.8  |
|                 |                   | <b>C6</b>  | 0.85 | 0    | 0.25 | 0    | 0.2  | 0.2  | 0.75 | 0.4  | 0.75 | 0.55 | 0.45 | 0.45 | 0.45 | 0    | 0.85 |
|                 | <b>Myoblasts</b>  | <b>C9</b>  | 0.85 | 0.25 | 0.2  | 0    | 0.2  | 0.1  | 0.55 | 1    | 0.6  | 1    | 0.65 | 0.25 | 0.65 | 0.25 | 1    |
|                 |                   | <b>P36</b> | 0    | 0.2  | 0    | 0.5  | 0.5  | 0.5  | 0.5  | 0.25 | 0.25 | 0.25 | 0.15 | 0.15 | 0.75 | 0.75 | 0.75 |
|                 | <b>Adult</b>      | <b>P37</b> | 0.15 | 0    | 0    | 0.6  | 0    | 0    | 0    | 0    | 0    | 0    | 0.5  | 0    | 0    | 0.5  | 1    |

|                       |     |      |    |      |      |      |      |      |      |      |      |      |      |      |      |      |
|-----------------------|-----|------|----|------|------|------|------|------|------|------|------|------|------|------|------|------|
| Late-onset<br>Control | P38 | 0    | 0  | 0.25 | 0.15 | 0.25 | 0.15 | 0.45 | 0.4  | 0.5  | 0.6  | 0.4  | 0.5  | 0.4  | 0.5  | 0.75 |
|                       | P56 | 0    | 0  | 0.85 | NA   | NA   | 0.2  | 0.75 | NA   | 0    | 0.2  | NA   | 0    | NA   | 0    | 0.2  |
|                       | C2  | 0.25 | 0  | 0.6  | 0.25 | 0.65 | 0.65 | 0.78 | 0.85 | 0.9  | 1    | 0.5  | 0.75 | 0.85 | 0.6  | 0.9  |
|                       | C3  | 0.35 | 0  | 0.55 | 0.4  | 0.55 | NA   | 0.65 | 0.6  | 0.6  | 0.9  | 0.9  | 0.6  | 0.65 | 0.5  | 0.6  |
|                       | C9  | 0.25 | 0  | 0.6  | 0.4  | 0.5  | NA   | 0.75 | 0.85 | 0.85 | 1    | 0.75 | 0.95 | 0.75 | 0.65 | 0.75 |
|                       | C10 | 0.4  | 0  | 0.67 | 0.25 | 0.67 | 0.5  | 0.75 | 1    | 1    | 1    | 0.75 | 0.75 | 0.6  | 0.75 | 0.75 |
| Myotubes              |     |      |    |      |      |      |      |      |      |      |      |      |      |      |      |      |
|                       |     |      |    |      |      |      |      |      |      |      |      |      |      |      |      |      |
| Juvenile              |     |      |    |      |      |      |      |      |      |      |      |      |      |      |      |      |
|                       |     |      |    |      |      |      |      |      |      |      |      |      |      |      |      |      |
| Adult                 |     |      |    |      |      |      |      |      |      |      |      |      |      |      |      |      |
|                       |     |      |    |      |      |      |      |      |      |      |      |      |      |      |      |      |
| Late-onset<br>Control | P13 | NA   | NA | 0    | 0    | 0    | 0    | 0.5  | 0.2  | 0.35 | 0.35 | 0.4  | 0.1  | 0.25 | 0.25 | 0.75 |
|                       | P36 | 0.4  | NA | 0.45 | 0.1  | 0.45 | 0.5  | 0.6  | 0.55 | 0.65 | 0.8  | 0.27 | 0.25 | 0.75 | 0.45 | 0.8  |
|                       | P37 | 0.6  | 0  | 0.25 | 0.20 | 0.5  | NA   | 0.78 | 1    | 0.8  | 1    | 0.70 | 0.85 | 0.35 | 0.65 | 0.9  |
|                       | P38 | 0.05 | 0  | 0.15 | 0.1  | 0.15 | 0.2  | 0.25 | 0.25 | 0.5  | 0.3  | 0.2  | 0.25 | 0.6  | 0.5  | 0.75 |
|                       | P56 | NA   | 0  | 0    | 0.55 | 0    | 0.55 | 0.2  | 0.6  | 0.25 | 0.5  | 0.6  | 0.5  | 0.1  | 0.6  | 0.35 |
|                       | C2  | 0.3  | 0  | 0.45 | 0.1  | 0.75 | NA   | 0.6  | 0.6  | 0.75 | 0.75 | 0.55 | 0.7  | 0.75 | 0.6  | 0.8  |
|                       | C4  | 0.5  | 0  | 0.7  | 0    | 0.75 | 0.5  | 0.8  | 0.75 | 1    | 1    | 0.75 | 0.8  | 0.5  | 0.75 | 0.75 |
|                       | C6  | 0    | 0  | 0    | 0    | 0.25 | 0    | 0    | 0    | 0    | 0    | 0    | 0    | 0    | NA   | 0.3  |
|                       | C9  | 0.5  | 0  | 0.75 | 0.4  | 0.55 | NA   | NA   | 0.85 | 1    | 1    | NA   | 0.75 | 0.85 | 1    |      |

**Table S21.** DNA methylation analysis of CTCF1 in skin and skin-derived cells

Range 0 to 1 indicates 0 to 100% methylation. NA = not available, Skin fibros= skin fibroblasts

[illegible]

[illegible]

**Table S23.** CTG expansion sizes in blood and muscle of the patients providing a muscle biopsy

|                | Blood progenitor | Blood modal | Muscle progenitor | Muscle modal |
|----------------|------------------|-------------|-------------------|--------------|
| Juvenile P13   | 286              | 445         | 691               | 736          |
| Adult P36      | 180              | 338         | 208               | 335          |
| Adult P37      | 199              | 374         | 469               | 788          |
| Adult P38      | 115              | 130         | 135               | 207          |
| Adult P68      | 322              | 619         | 351               | 758          |
| Late-onset P56 | 300              | 381         | NA                | NA           |
| Late-onset P67 | 108              | 246         | 128               | 512          |

**Table S24.** DNA methylation analysis of CTCF2 in skin and skin-derived cells

[illegible]

**Table S25.** DNA methylation analysis of CTCF2 in muscle and muscle-derived cells

|                  |                   | CpG<br>→ | 1  | 2  | 3  | 4 | 5 | 6 | 7 | 8 | 9 | 10 | 11 |
|------------------|-------------------|----------|----|----|----|---|---|---|---|---|---|----|----|
| <b>Muscle</b>    | <b>Juvenile</b>   | P13      | NA | NA | NA | 0 | 0 | 0 | 0 | 0 | 0 | 0  | 0  |
|                  |                   | P36      | NA | NA | NA | 0 | 0 | 0 | 0 | 0 | 0 | 0  | 0  |
|                  | <b>Adult</b>      | P37      | NA | NA | NA | 0 | 0 | 0 | 0 | 0 | 0 | 0  | 0  |
|                  |                   | P38      | NA | NA | NA | 0 | 0 | 0 | 0 | 0 | 0 | 0  | 0  |
|                  | <b>Late-onset</b> | P68      | NA | NA | NA | 0 | 0 | 0 | 0 | 0 | 0 | 0  | 0  |
|                  |                   | P56      | NA | NA | NA | 0 | 0 | 0 | 0 | 0 | 0 | 0  | 0  |
|                  | <b>Control</b>    | P67      | NA | NA | NA | 0 | 0 | 0 | 0 | 0 | 0 | 0  | 0  |
|                  |                   | C4       | NA | NA | NA | 0 | 0 | 0 | 0 | 0 | 0 | 0  | 0  |
|                  |                   | C6       | NA | NA | NA | 0 | 0 | 0 | 0 | 0 | 0 | 0  | 0  |
|                  |                   | C9       | NA | NA | NA | 0 | 0 | 0 | 0 | 0 | 0 | 0  | 0  |
| <b>Myoblasts</b> | <b>Juvenile</b>   | P13      | NA | 0  | 0  | 0 | 0 | 0 | 0 | 0 | 0 | 0  | 0  |
|                  |                   | P36      | NA | 0  | 0  | 0 | 0 | 0 | 0 | 0 | 0 | 0  | 0  |
|                  | <b>Adult</b>      | P37      | NA | 0  | 0  | 0 | 0 | 0 | 0 | 0 | 0 | 0  | 0  |
|                  |                   | P38      | NA | 0  | 0  | 0 | 0 | 0 | 0 | 0 | 0 | 0  | 0  |
|                  | <b>Late-onset</b> | P56      | NA | 0  | 0  | 0 | 0 | 0 | 0 | 0 | 0 | 0  | 0  |
|                  |                   | C2       | 0  | 0  | 0  | 0 | 0 | 0 | 0 | 0 | 0 | 0  | 0  |
|                  | <b>Control</b>    | C3       | 0  | 0  | 0  | 0 | 0 | 0 | 0 | 0 | 0 | 0  | 0  |
|                  |                   | C9       | 0  | 0  | 0  | 0 | 0 | 0 | 0 | 0 | 0 | 0  | 0  |
|                  |                   | C10      | 0  | 0  | 0  | 0 | 0 | 0 | 0 | 0 | 0 | 0  | 0  |
|                  |                   |          |    |    |    |   |   |   |   |   |   |    |    |
| <b>Myotubes</b>  | <b>Juvenile</b>   | P13      | NA | 0  | 0  | 0 | 0 | 0 | 0 | 0 | 0 | 0  | 0  |
|                  |                   | P36      | NA | 0  | 0  | 0 | 0 | 0 | 0 | 0 | 0 | 0  | 0  |
|                  | <b>Adult</b>      | P37      | NA | 0  | 0  | 0 | 0 | 0 | 0 | 0 | 0 | 0  | 0  |
|                  |                   | P38      | NA | 0  | 0  | 0 | 0 | 0 | 0 | 0 | 0 | 0  | 0  |
|                  | <b>Late-onset</b> | P56      | NA | 0  | 0  | 0 | 0 | 0 | 0 | 0 | 0 | 0  | 0  |
|                  |                   | C2       | 0  | 0  | 0  | 0 | 0 | 0 | 0 | 0 | 0 | 0  | 0  |
|                  | <b>Control</b>    | C4       | 0  | 0  | 0  | 0 | 0 | 0 | 0 | 0 | 0 | 0  | 0  |
|                  |                   | C9       | 0  | 0  | 0  | 0 | 0 | 0 | 0 | 0 | 0 | 0  | 0  |
|                  |                   | C6       | 0  | 0  | 0  | 0 | 0 | 0 | 0 | 0 | 0 | 0  | 0  |
|                  |                   |          |    |    |    |   |   |   |   |   |   |    |    |

Range 0 to 1 indicates 0 to 100% methylation. NA = not available
